# Supplementary material for: Soil Microbial Community Characteristics and Their Effect on Tea Quality under Different Fertilization Treatments in Two Tea Plantations
Source: Genes (Basel). 2024 May 11;15(5):610. doi: 10.3390/genes15050610 (PMC11121415; doi:10.3390/genes15050610)
Supplement: Supplementary file 1 [file genes-15-00610-s001.zip]

Archive with 8 entries (8 files):
- Figure S1.pdf
- Figure S2.pdf
- Table S1 The quality control fo 16S sequencing.xlsx
- Table S2 The quality control fo ITS sequencing.xlsx
- Table S3 Anosim analyses.xlsx
- Table S4 Bacterial community structure and abundance.xlsx
- Table S5 Fungal community structure and abundance.xlsx
- Table S6 Network topological characteristics of microbial communities.xlsx
