# Supplementary material for: Soil Microbial Community Characteristics and Their Effect on Tea Quality under Different Fertilization Treatments in Two Tea Plantations
Source: Genes (Basel). 2024 May 11;15(5):610. doi: 10.3390/genes15050610 (PMC11121415; doi:10.3390/genes15050610)
Supplement: Supplementary file 1 [file genes-15-00610-s001.zip › Table S1 The quality control fo 16S sequencing.xlsx]

## Sheet: Sheet1
Table S1 The quality control of 16S sequencing
Sample Name	Raw PEs	Raw Tags	Clean Tags	Effective Tags	Base (nt)	Average length (nt)	Q20 (%)	Q30 (%)	GC content (%)	Effective (%)
HA_1	98669	97674	96969	67301	17065727	254	99.34	97.88	57.14	68.21
HA_2	80993	80120	79552	62375	15799145	253	99.37	97.92	54.67	77.01
HA_3	96460	94384	93434	69812	17949681	257	99.26	97.65	56.23	72.37
HA_4	99070	97748	96984	65218	16587827	254	99.34	97.87	56.96	65.83
HA_5	90626	89525	88892	66368	16848966	254	99.3	97.75	56.59	73.23
HA_6	88629	87713	87153	64587	16353693	253	99.38	98	57.1	72.87
HB_1	82552	81431	80773	68891	17456993	253	99.38	97.99	57.59	83.45
HB_2	85999	84935	84288	64937	16439677	253	99.37	97.95	56.86	75.51
HB_3	85358	84429	83813	67760	17156565	253	99.37	97.97	57.44	79.38
HB_4	86630	85486	84810	67963	17208368	253	99.38	97.98	57.47	78.45
HB_5	81720	80782	80288	64470	16320065	253	99.34	97.88	57.73	78.89
HB_6	88514	87194	86643	69406	17575658	253	99.39	98	57.31	78.41
QA_1	89621	87882	87073	66940	17160928	256	99.29	97.74	56.87	74.69
QA_2	91995	90932	90308	63966	16197208	253	99.36	97.91	56.52	69.53
QA_3	90704	89409	88752	67495	17223368	255	99.32	97.82	56.52	74.41
QA_4	98252	97253	96664	64075	16229223	253	99.37	97.94	57.31	65.21
QA_5	99386	98222	97497	63601	16104296	253	99.27	97.67	56.05	63.99
QA_6	99048	96972	96130	65004	16590561	255	99.36	97.88	56.75	65.63
QB_1	95935	94963	94394	62884	15915120	253	99.36	97.93	55.64	65.55
QB_2	92670	91426	90766	62819	15907486	253	99.36	97.92	56.94	67.79
QB_3	85021	84163	83679	63238	16008018	253	99.37	97.96	57.11	74.38
QB_4	94880	93606	93032	61058	15476383	253	99.35	97.87	56.9	64.35
QB_5	90868	89545	88962	63039	15961523	253	99.35	97.91	57.98	69.37
QB_6	84166	82820	82276	61876	15662765	253	99.41	98.04	57.19	73.52
Total	2177766	2148614	2133132	1565083	397199244	—	—	—	—	—
Average	90740.2	89525.6	88880.5	65211.8	1.655e+07	253.583	99.3496	97.8929	56.8696	72.1679
Note:
Raw Pes (Paired-ends), the original raw PEs
Raw Tags, the total tags processed form the Raw PEs
Clean Tags, the tags filtered for low quality and short length
Effective Tags, a effective tags used for analyses
Base (nt), the number of base
Average length (nt), the average length of Effective Tags
Q20 and Q30, refers to the percentage of bases in Effective Tags with base mass values greater than 20 (sequencing error rate less than 1%) and 30 (sequencing error rate less than 0.1%)
GC content (%), the GC content of Effective Tags
Effective (%), referes to The number of Effective Tags as a percentage of the number of Raw PEs
