# Supplementary material for: Soil Microbial Community Characteristics and Their Effect on Tea Quality under Different Fertilization Treatments in Two Tea Plantations
Source: Genes (Basel). 2024 May 11;15(5):610. doi: 10.3390/genes15050610 (PMC11121415; doi:10.3390/genes15050610)
Supplement: Supplementary file 1 [file genes-15-00610-s001.zip › Table S2 The quality control fo ITS sequencing.xlsx]

## Sheet: Sheet1
Table S2 The quality control of ITS sequencing
Sample Name	Raw PEs	Raw Tags	Clean Tags	Effective Tags	Base (nt)	Average length (nt)	Q20 (%)	Q30 (%)	GC content (%)	Effective (%)
HA_1	89248	88006	87658	63832	14273240	224	99.13	97.22	51.07	71.52
HA_2	98371	76963	74306	63650	16144634	254	98.73	96.04	47.02	64.7
HA_3	98473	93251	92052	67540	15396889	228	98.88	96.68	50.81	68.59
HA_4	94623	88142	87242	63402	13883003	219	99.1	97.05	48.84	67
HA_5	82047	74217	73185	66159	15225983	230	98.96	96.78	51.36	80.64
HA_6	111254	102333	101450	69120	15228774	220	98.84	96.61	49.54	62.13
HB_1	74410	72042	71336	63460	14580839	230	99.14	97.17	53.19	85.28
HB_2	83812	80845	79931	68914	15878973	230	99.01	96.88	51.06	82.22
HB_3	92775	90544	90019	64396	14542471	226	99.1	97.14	51.34	69.41
HB_4	57824	56444	53615	52373	12174812	232	99.03	96.86	53.27	90.57
HB_5	95101	92953	92288	60627	14149027	233	99.03	96.85	49.19	63.75
HB_6	81729	78555	78000	68886	16231721	236	98.97	96.6	50.32	84.29
QA_1	90641	88996	88609	67073	15674036	234	99.11	97.05	52.63	74
QA_2	90855	88438	87889	69333	17562521	253	99.03	96.63	51.18	76.31
QA_3	74472	67097	66821	46613	10962352	235	99.06	96.9	49.7	62.59
QA_4	95656	94109	93694	69095	17035612	247	98.88	96.28	51.56	72.23
QA_5	97594	95082	94396	67096	16595253	247	99.02	96.68	50.59	68.75
QA_6	102336	100635	99726	61807	14775783	239	98.87	96.44	51.76	60.4
QB_1	84161	82113	79743	67558	15547934	230	99.1	97.1	49.26	80.27
QB_2	96836	94614	93613	60914	14263774	234	99.05	96.89	50.98	62.9
QB_3	80332	78699	78394	69635	15954553	229	99.12	97.16	48.59	86.68
QB_4	63266	62138	61561	58990	14405130	244	99.01	96.7	53.65	93.24
QB_5	85856	83466	81634	62048	14705478	237	99.1	97.03	52.1	72.27
QB_6	83385	82173	81836	63230	15040459	238	98.98	96.7	49.17	75.83
Total	2105057	2011855	1988998	1535751	360233251	—	—	—	—	—
Average	87710.7	83827.3	82874.9	63989.6	1.50097e+07	234.542	99.0104	96.81	50.7575	73.9821
Note:
Raw Pes (Paired-ends), the original raw PEs
Raw Tags, the total tags processed form the Raw PEs
Clean Tags, the tags filtered for low quality and short length
Effective Tags, a effective tags used for analyses
Base (nt), the number of base
Average length (nt), the average length of Effective Tags
Q20 and Q30, refers to the percentage of bases in Effective Tags with base mass values greater than 20 (sequencing error rate less than 1%) and 30 (sequencing error rate less than 0.1%)
GC content (%), the GC content of Effective Tags
Effective (%), referes to The number of Effective Tags as a percentage of the number of Raw PEs
