# Supplementary material for: Soil Microbial Community Characteristics and Their Effect on Tea Quality under Different Fertilization Treatments in Two Tea Plantations
Source: Genes (Basel). 2024 May 11;15(5):610. doi: 10.3390/genes15050610 (PMC11121415; doi:10.3390/genes15050610)
Supplement: Supplementary file 1 [file genes-15-00610-s001.zip › Table S3 Anosim analyses.xlsx]

## Sheet: Sheet1
Table S3 The ANOSIM analyses of sample groups
16s amplicon
	Group	R-value	P-value
	HB-HA	0.3759	0.003
	QB-HA	0.3463	0.006
	QB-HB	0.1667	0.064
	QA-HA	0.2056	0.014
	QA-HB	0.8852	0.002
	QA-QB	0.3519	0.003
ITS amplicon
	Group	R-value	P-value
	HA-HB	0.2463	0.039
	QA-HB	0.8204	0.005
	QA-HA	0.487	0.003
	QB-HB	0.5074	0.002
	QB-HA	0.3056	0.029
	QB-QA	0.05185	0.269
