# Supplementary material for: Soil Microbial Community Characteristics and Their Effect on Tea Quality under Different Fertilization Treatments in Two Tea Plantations
Source: Genes (Basel). 2024 May 11;15(5):610. doi: 10.3390/genes15050610 (PMC11121415; doi:10.3390/genes15050610)
Supplement: Supplementary file 1 [file genes-15-00610-s001.zip › Table S4 Bacterial community structure and abundance.xlsx]

## Sheet: Sheet1
Table S4 Bacterial community structure and abundance in soil sample
Taxonomic level
Phylum		Proteobacteria	Acidobacteria	Actinobacteria	Firmicutes	Chloroflexi	Bacteroidetes	Planctomycetes	unidentified_Bacteria	Thaumarchaeota	Verrucomicrobia	Others
	HA	0.446999	0.164186	0.14505	0.052033	0.052279	0.034916	0.015402	0.011213	0.002063	0.015774	0.060085
	HB	0.36182	0.214754	0.16247	0.016088	0.090149	0.017959	0.016502	0.003663	0.013093	0.02968	0.073822
	QA	0.443914	0.162854	0.183025	0.02246	0.043995	0.037165	0.027157	0.002741	0.0021	0.015241	0.059349
	QB	0.369606	0.193403	0.165546	0.019971	0.089328	0.038689	0.016742	0.004171	0.004654	0.024552	0.073336
Class
		Gammaproteobacteria	Acidobacteriia	Alphaproteobacteria	unidentified_Actinobacteria	Ktedonobacteria	Bacteroidia	Erysipelotrichia	Clostridia	unidentified_Bacteria	Thermoleophilia	Others
	HA	0.227613	0.138584	0.187705	0.091456	0.039564	0.034515	0.019855	0.014038	0.011213	0.038192	0.197264
	HB	0.1236	0.203922	0.20688	0.109133	0.075377	0.017089	0.001575	0.006652	0.003663	0.036386	0.215722
	QA	0.165817	0.152778	0.252978	0.122344	0.035666	0.036934	0.001691	0.00637	0.002741	0.043775	0.178907
	QB	0.128277	0.18633	0.218011	0.111873	0.073949	0.038235	0.000308	0.009085	0.004171	0.036821	0.19294
Order
		Xanthomonadales	Acidobacteriales	unidentified_Gammaproteobacteria	unidentified_Alphaproteobacteria	Ktedonobacterales	Frankiales	Erysipelotrichales	Rhizobiales	Sphingobacteriales	Clostridiales	Others
	HA	0.101552	0.096028	0.10191	0.083655	0.038904	0.049411	0.019855	0.062846	0.007716	0.014036	0.424087
	HB	0.023556	0.122505	0.079915	0.133058	0.07466	0.078767	0.001575	0.045708	0.002523	0.006633	0.4311
	QA	0.037924	0.110451	0.099983	0.110335	0.034986	0.075095	0.001691	0.080613	0.007937	0.006359	0.434628
	QB	0.031111	0.116547	0.073418	0.115559	0.07332	0.070387	0.000308	0.059168	0.012232	0.009071	0.438879
Family
		Rhodanobacteraceae	unidentified_Alphaproteobacteria	Acidothermaceae	Erysipelotrichaceae	Ktedonobacteraceae	unidentified_Gammaproteobacteria	Xanthobacteraceae	Burkholderiaceae	unidentified_Acidobacteriales	Sphingobacteriaceae	Others
	HA	0.094044	0.069332	0.044071	0.019855	0.024868	0.038576	0.044808	0.033843	0.036536	0.007217	0.58685
	HB	0.020533	0.119034	0.077155	0.001575	0.055191	0.055764	0.03881	0.014657	0.039595	0.001905	0.575781
	QA	0.032708	0.086305	0.065138	0.001691	0.024749	0.051342	0.061649	0.037509	0.05354	0.007194	0.578174
	QB	0.024958	0.097053	0.067254	0.000308	0.057102	0.04509	0.044661	0.021171	0.050543	0.011487	0.580373
Genus
		Rhodanobacter	Acidothermus	Acidibacter	Chujaibacter	Cytophaga	unidentified_Bacteria	Ileibacterium	Galbibacter	Faecalibaculum	Pedobacter	Others
	HA	0.068109	0.044071	0.028447	0.018831	0.000604	0.009895	0.008975	0.007135	0.007488	0.00396	0.802485
	HB	0.010228	0.077155	0.051322	0.006683	6.8e-05	0.003023	0.000502	0.000251	0.000641	0.000787	0.849339
	QA	0.019864	0.065138	0.043306	0.005907	0.009271	0.002244	0.000548	0.000302	0.000677	0.002549	0.850194
	QB	0.015258	0.067254	0.04117	0.004555	0.000463	0.003593	2.3e-05	0	7.1e-05	0.00663	0.860984
Species
		Ileibacterium_valens	Galbibacter_marinus	Bradyrhizobium_elkanii	Janthinobacterium_sp	Brevundimonas_bullata	Bacteroides_plebeius	bacterium_Ellin5264	Lachnospiraceae_bacterium_10-1	Pedobacter_panaciterrae	Stenotrophomonas_rhizophila	Others
	HA	0.008975	0.007135	0.016641	0.00182	0.000505	4e-05	0.003824	0.002947	0.000206	0.000212	0.957695
	HB	0.000502	0.000251	0.011448	0.000531	0.000141	0.000296	0.006932	0.000469	8.7e-05	0.000116	0.979227
	QA	0.000548	0.000302	0.021521	0.006827	0.001078	0.000135	0.00534	0.000514	0.000934	0.000516	0.962285
	QB	2.3e-05	0	0.012023	0.001377	0.004047	0.002825	0.007087	0.000116	0.00241	0.002407	0.967684
