# Supplementary material for: Soil Microbial Community Characteristics and Their Effect on Tea Quality under Different Fertilization Treatments in Two Tea Plantations
Source: Genes (Basel). 2024 May 11;15(5):610. doi: 10.3390/genes15050610 (PMC11121415; doi:10.3390/genes15050610)
Supplement: Supplementary file 1 [file genes-15-00610-s001.zip › Table S5 Fungal community structure and abundance.xlsx]

## Sheet: Sheet1
Table S5 Fungal community structure and abundance in soil sample
Taxonomic level
Phylum		Ascomycota	Basidiomycota	Mucoromycota	Mortierellomycota	Glomeromycota	Rozellomycota	Chytridiomycota	Zoopagomycota	Blastocladiomycota	Monoblepharomycota	Others
	HA	0.570372	0.112289	0.01736	0.056805	0.002134	0.000791	0.000502	0.000124	0	0	0.239623
	HB	0.717541	0.101237	0.078675	0.009899	0.002207	0.000326	0.000461	2.9e-05	0	7e-06	0.089617
	QA	0.54367	0.163361	0.016726	0.018736	0.00235	8.1e-05	0.000458	9.5e-05	0	7.7e-05	0.254446
	QB	0.6126	0.162804	0.020676	0.032717	0.00428	0.000275	0.000567	0.000417	5.9e-05	1.1e-05	0.165594
Class
		Sordariomycetes	Archaeorhizomycetes	Agaricomycetes	Umbelopsidomycetes	Tremellomycetes	Leotiomycetes	Eurotiomycetes	Dothideomycetes	Mortierellomycetes	Orbiliomycetes	Others
	HA	0.48163	0.002735	0.008738	0.015632	0.089207	0.02768	0.045632	0.004569	0.056743	0.000754	0.266681
	HB	0.426307	0.154908	0.065262	0.076625	0.026179	0.031033	0.081746	0.014691	0.009895	8.8e-05	0.113266
	QA	0.340168	0.007615	0.128034	0.011133	0.005319	0.067143	0.067843	0.035345	0.018736	0.006509	0.312155
	QB	0.454207	0.006714	0.064727	0.011766	0.00894	0.039643	0.063753	0.036634	0.032717	0.00015	0.280749
Order
		Hypocreales	Sordariales	Boletales	Umbelopsidales	Microascales	Auriculariales	Tremellales	Eurotiales	Capnodiales	Polyporales	Others
	HA	0.444641	0.026303	0.004873	0.015493	0.002039	6.2e-05	0.088263	0.042422	0.001157	0.000187	0.374562
	HB	0.403932	0.004177	0.043601	0.07631	0.000315	5.5e-05	0.025662	0.076266	0.002819	0.000476	0.366387
	QA	0.170844	0.112128	5.5e-05	0.011019	0.036894	0.094925	0.005059	0.062337	0.02873	0.003361	0.474649
	QB	0.330888	0.066894	0.000399	0.011641	0.022818	0.014131	0.00842	0.057944	0.025461	0.026724	0.43468
Family
		Stachybotryaceae	Chaetomiaceae	Hypocreaceae	Nectriaceae	Pisolithaceae	Umbelopsidaceae	Microascaceae	Auriculariaceae	Trimorphomycetaceae	Cladosporiaceae	Others
	HA	0.184521	0.024129	0.093981	0.145785	0.003826	0.015493	0.002028	4.4e-05	0.087036	0.00101	0.442148
	HB	0.274332	0.001625	0.075453	0.051252	0.041426	0.07631	0.000315	5.5e-05	0.024879	0.00272	0.451633
	QA	0.106984	0.072891	0.03137	0.030187	1.5e-05	0.011019	0.036821	0.092612	0.004492	0.027324	0.586286
	QB	0.239477	0.041799	0.032025	0.053196	1.8e-05	0.011641	0.022741	0.013805	0.006974	0.024648	0.553675
Genus
		Myrothecium	Trichocladium	Trichoderma	Fusarium	Pisolithus	Umbelopsis	Cephalotrichum	Auricularia	Saitozyma	Cladosporium	Others
	HA	0.183635	6.2e-05	0.093981	0.14006	0.003826	0.015493	8.1e-05	4.4e-05	0.087036	0.001007	0.474777
	HB	0.27357	7e-06	0.075387	0.02981	0.041426	0.07631	3.3e-05	5.5e-05	0.024879	0.00272	0.475802
	QA	0.106032	0.064211	0.030843	0.02437	1.5e-05	0.011019	0.036235	0.092612	0.004488	0.02731	0.602866
	QB	0.236402	0.03376	0.031436	0.039998	1.8e-05	0.011641	0.016144	0.013805	0.00697	0.02455	0.585275
Species
		Trichocladium_asperum	Fusarium_oxysporum	Cephalotrichum_stemonitis	Cladosporium_chasmanthicola	Cercophora_coprophila	Isaria_fumosorosea	Trichoderma_koningiopsis	Oidiodendron_truncatum	Russula_virescens	Aspergillus_flavus	Others
	HA	6.2e-05	0.137376	8.1e-05	0.001007	1.5e-05	0.018242	0.025062	0.019574	0.000351	0.00019	0.798039
	HB	7e-06	0.02906	3.3e-05	0.002716	0	0.000143	0.003108	0.00045	0.013292	0.000227	0.950963
	QA	0.064211	0.022686	0.036235	0.027302	0.000758	0	0.009987	0.000425	0	0.011308	0.827088
	QB	0.03376	0.035693	0.016144	0.024495	0.01967	0	0.003057	0.002563	1.1e-05	0.000893	0.863715
