# Supplementary material for: Soil Microbial Community Characteristics and Their Effect on Tea Quality under Different Fertilization Treatments in Two Tea Plantations
Source: Genes (Basel). 2024 May 11;15(5):610. doi: 10.3390/genes15050610 (PMC11121415; doi:10.3390/genes15050610)
Supplement: Supplementary file 1 [file genes-15-00610-s001.zip › Table S6 Network topological characteristics of microbial communities.xlsx]

## Sheet: Sheet1
Table S6 The key characteristics of network analyses in microbial communities
Bacteria
	ND (Network diameter)	MD (modularity)	CC (Clustering coefficient)	GD (graph density)	AD (Average degree)	APL (average path length)
HA	13	0.514247	0.519598	0.0376131	20.5368	4.62064
HB	15	0.577413	0.478723	0.0314625	17.3673	5.25952
QA	16	0.551195	0.47765	0.0329529	18.1241	5.07358
QB	15	0.551564	0.507516	0.0364161	19.956	5.00752
Fungi
HA	14	0.551089	0.593449	0.0559917	13.55	4.65976
HB	17	0.615275	0.528052	0.0339695	8.08475	5.49936
QA	11	0.602816	0.458371	0.0275492	7.16279	3.75734
QB	15	0.546408	0.454782	0.0323792	8.4186	5.42045
