# Supplementary figures and images for: Soil Microbial Community Characteristics and Their Effect on Tea Quality under Different Fertilization Treatments in Two Tea Plantations
Source: MDPI journal article supplement (doi:10.3390/genes15050610), 2024-05-11

## Phylum

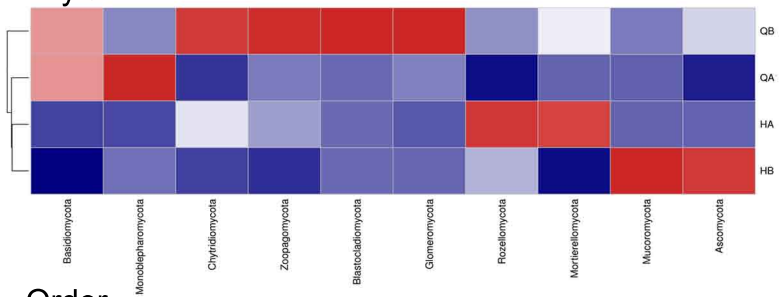

## Class

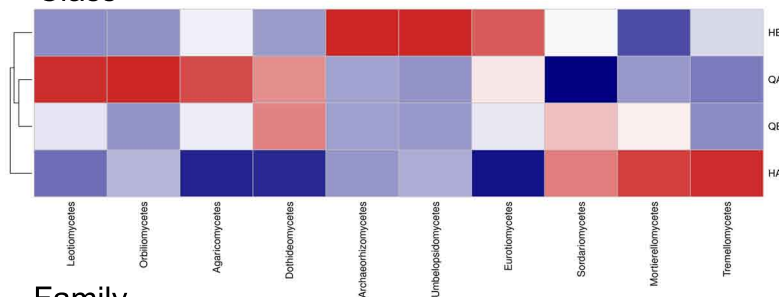

## Order

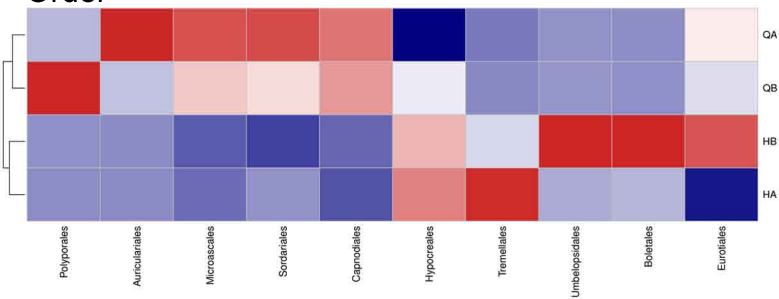

## Family

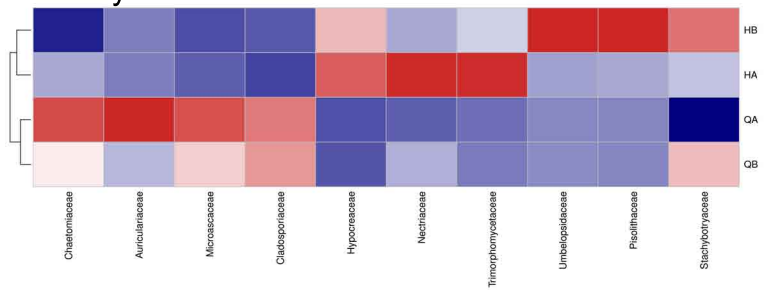

## Genus

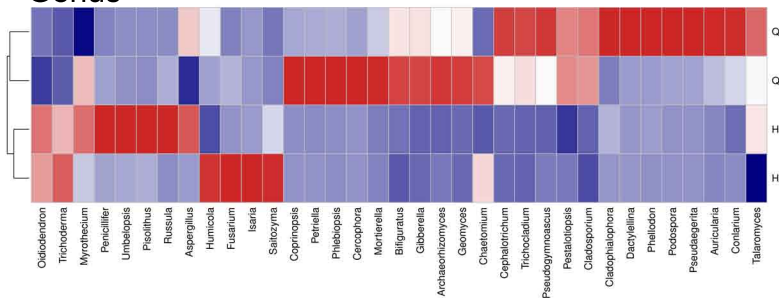

## Species

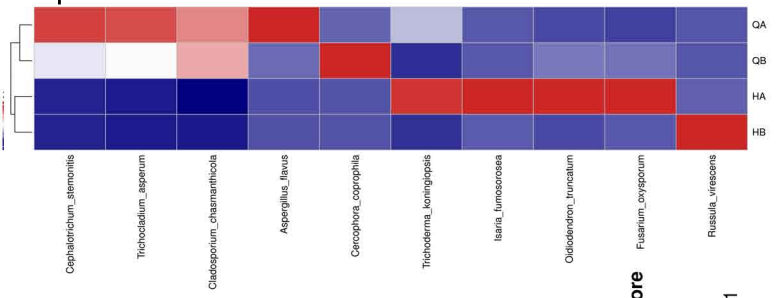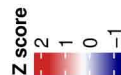

Supplement: s1 [file s1]

# Phylum

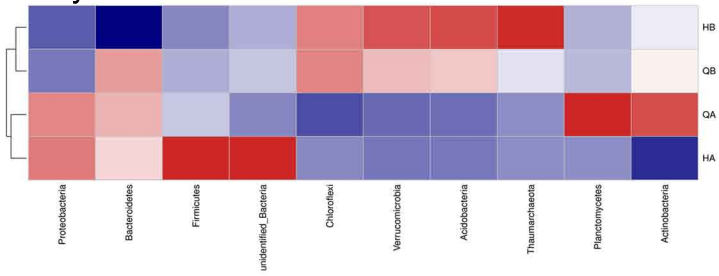

# Class

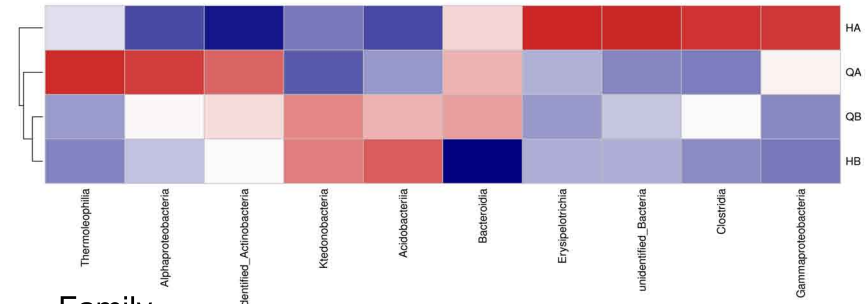

# Order

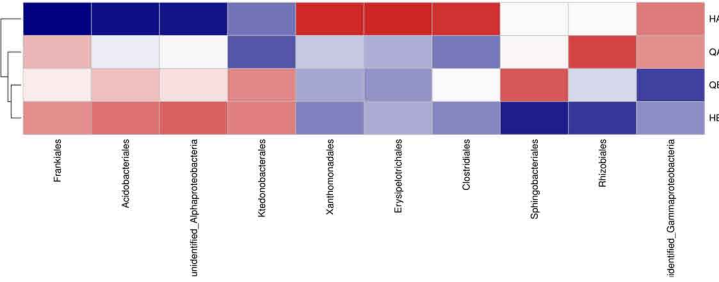

# Family

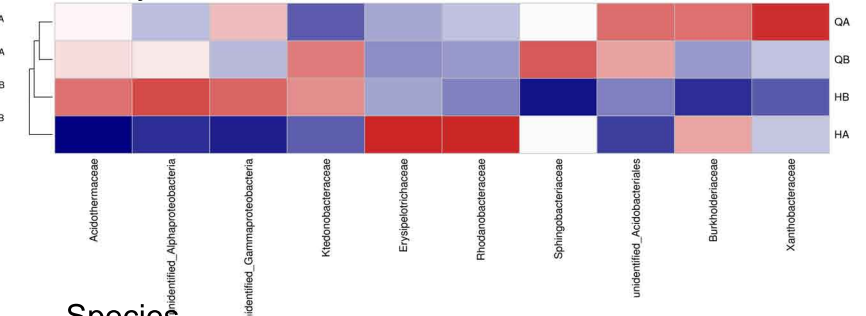

# Genus

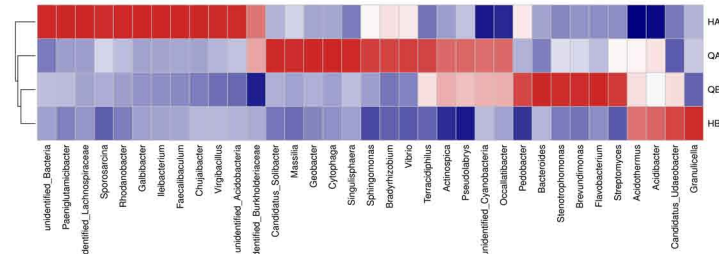

# Species

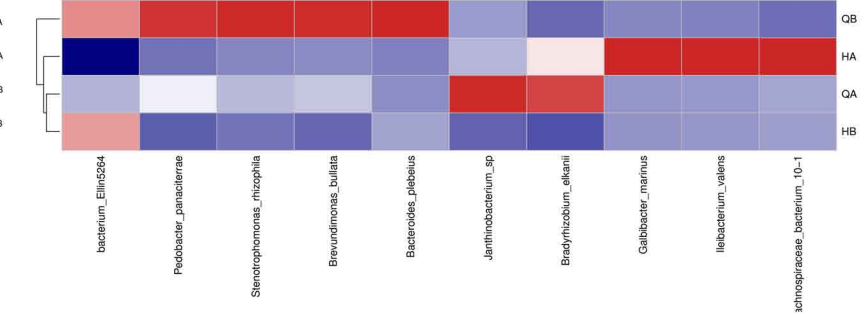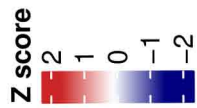

Supplement: s1 [file s1]
